CORRECTION

# Correction: Development of Self-Management Indicators for Chronic Hepatitis B Patients on Antiviral Therapy: Results of a Chinese Delphi Panel Survey

The *PLOS ONE* Staff

There is an error in affiliation 1 for authors Ling-Na Kong and Bo Qin. Affiliation 1 should read: Department of Infectious Diseases, the First Affiliated Hospital of Chongqing Medical University, Chongqing, PR China.

The publisher apologizes for the error.

## Reference

1. Kong L-N, Guo Y, Qin B, Peng X, Zhu W-F (2015) Development of Self-Management Indicators for Chronic Hepatitis B Patients on Antiviral Therapy: Results of a Chinese Delphi Panel Survey. *PLoS ONE* 10(9): e0134125. doi:[10.1371/journal.pone.0134125](https://doi.org/10.1371/journal.pone.0134125) PMID: [26327606](https://pubmed.ncbi.nlm.nih.gov/26327606/)

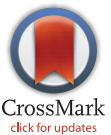

## OPEN ACCESS

**Citation:** The *PLOS ONE* Staff (2015) Correction: Development of Self-Management Indicators for Chronic Hepatitis B Patients on Antiviral Therapy: Results of a Chinese Delphi Panel Survey. *PLoS ONE* 10(11): e0143464. doi:[10.1371/journal.pone.0143464](https://doi.org/10.1371/journal.pone.0143464)

**Published:** November 16, 2015

**Copyright:** © 2015 The PLOS ONE Staff. This is an open access article distributed under the terms of the [Creative Commons Attribution License](https://creativecommons.org/licenses/by/4.0/), which permits unrestricted use, distribution, and reproduction in any medium, provided the original author and source are credited.
